# Supplementary material
Source: PubMed Central journal article supplement (PMC7480377)
Supplement: AEM.00999-20-s0001.pdf [file AEM.00999-20-s0001.pdf]

## SUPPLEMENTAL MATERIALS

**The phospholipid:diacylglycerol acyltransferase-mediated acyl-CoA-independent pathway efficiently diverts fatty acid flux from phospholipid into triacylglycerol in *Escherichia coli***

Lian Wang<sup>a, 1</sup>, Shan Jiang<sup>a, 1</sup>, Wen-Chao Chen<sup>a, 1, b, c, d</sup>, Xue-Rong Zhou<sup>c</sup>, Ting-Xuan Huang<sup>a</sup>,  
Feng-Hong Huang<sup>a, b, c, d</sup>, Xia Wan<sup>a, b, c, d</sup>

<sup>a</sup>Oil Crops Research Institute of the Chinese Academy of Agricultural Sciences, Wuhan 430062, P.R. China

<sup>b</sup>Key Laboratory of Biology and Genetic Improvement of Oil Crops, Ministry of Agriculture, Wuhan 430062, P.R. China

<sup>c</sup>Oil Crops and Lipids Process Technology National & Local Joint Engineering Laboratory, Wuhan 430062, P.R. China

<sup>d</sup>Hubei Key Laboratory of Lipid Chemistry and Nutrition, Wuhan 430062, P.R. China

<sup>e</sup>CSIRO Agriculture & Food, Canberra 2601, Australia

Corresponding author: Xia Wan, [wanzia@oilcrops.cn](mailto:wanzia@oilcrops.cn).

<sup>1</sup>Lian Wang, Shan Jiang, and Wen-Chao Chen are co-first authors.

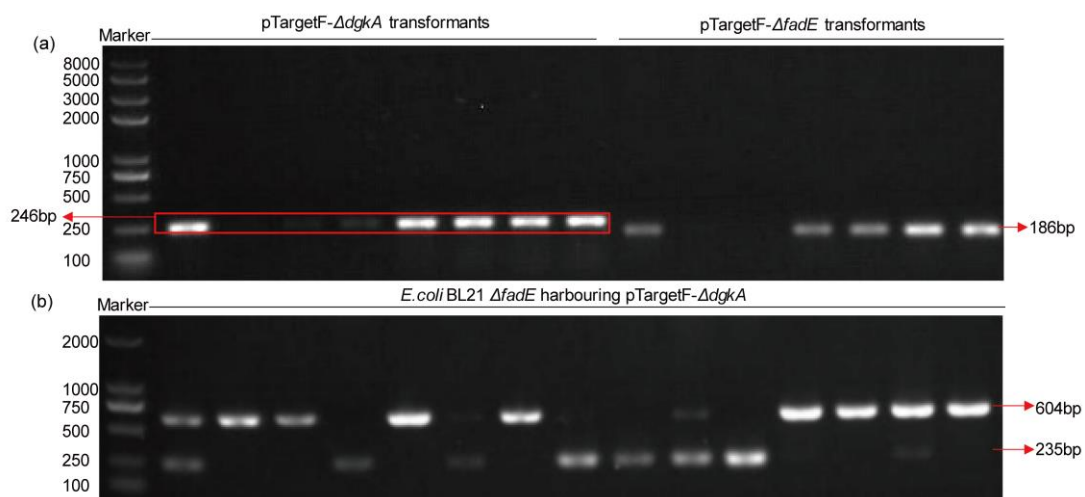

**Figure S1 Confirmation of double mutant strain  $\Delta\Delta$ BL21 by using PCR analysis. a,** either *dgkA* or *fadE* was deleted in BL21. b, deletion of *dgkA* in BL21 $\Delta fadE$ .to generate double mutant  $\Delta\Delta$ BL21.

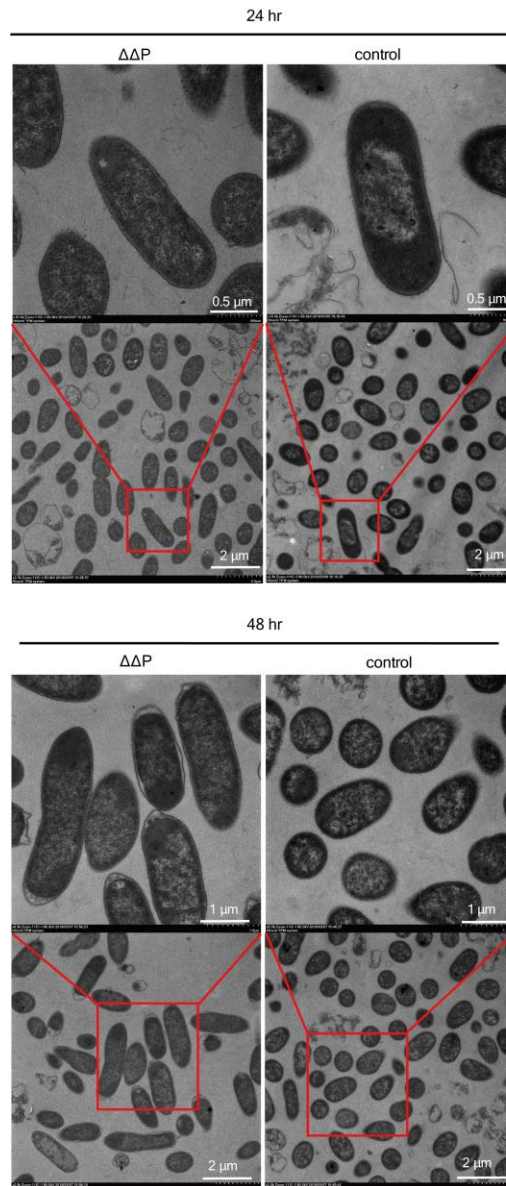

**Figure S2 Observation of cells harboring either *CrPDAT* ( $\Delta\Delta P$ ) or empty vector (control) by using transmission electron microscopy. Cells were cultured in auto-induction medium with 3% glycerol at 37 °C with shaking at 200 rpm for 24 or 48 hrs.**

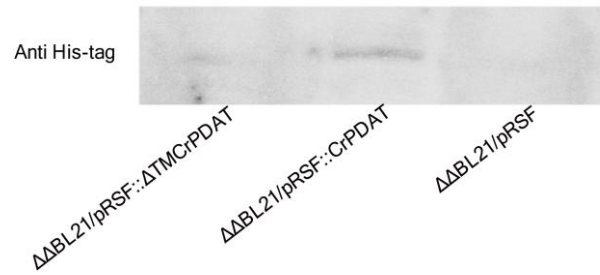

**Figure S3 Western blot analysis of double mutant  $\Delta\Delta\text{BL21}$  harboring either full-length *CrPDAT* or truncated *ATMCrPDAT*.** The proteins from engineered cells were blotted with anti His-tag monoclonal antibody.  $\Delta\Delta\text{BL21}$  harboring empty vector was used as negative control.

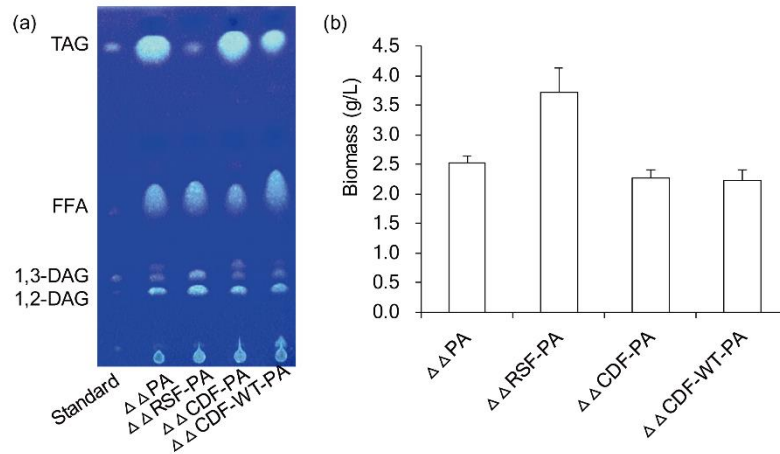

**Figure S4 Change of vector or ribosome binding site (RBS) greatly affects TAG production.** a, Thin-layer chromatography (TLC) result of neutral lipid profile. b, Biomass from different recombinant cells. Cells were cultured in auto-induction medium with 3% glycerol at 37 °C with shaking at 200 rpm for 48 hrs. Lipids extracted from 10 mg of dried cells. All data are the mean  $\pm$  standard deviations from triplicate samples.

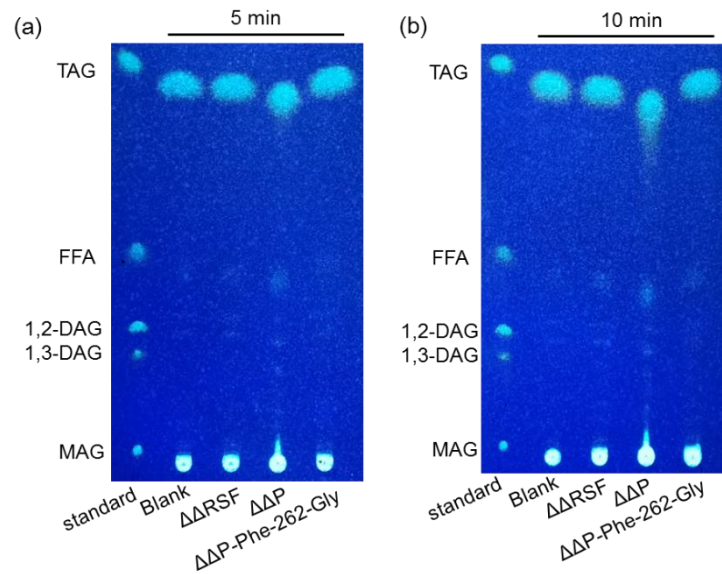

**Figure S5 *In vitro* enzyme assay for detecting TAG lipase activity of CrPDAT and its mutant Phe-262-Gly.** Lipids extracted from reaction mixture for 5 min (a) and 10 min (b) were analyzed by thin-layer chromatography (TLC). Blank: reaction mixture without enzyme;  $\Delta\Delta$ RSF:  $\Delta\Delta$ ABL21 harboring empty vector pRSFDuet-1 as a negative control;  $\Delta\Delta$ P:  $\Delta\Delta$ ABL21 harboring CrPDAT;  $\Delta\Delta$ P-Phe-262-Gly:  $\Delta\Delta$ ABL21 harboring CrPDAT mutant Phe-262-Gly.

**Table S1 List of codon optimized sequences for CrPDAT, ScPDAT and RcPDAT.**

| Name   | Codon optimized sequence                                                                                                                                                                                                                                                                                                                                                                                                                                                                                                                                                                                                                                                                                                                                                                                                                                                                                                                                                                                                                                                                                                                                                                                                                                                                                                                                                                                                                                                                                                                                                                                                                                                                                                                                                                                                                                                                                                                                                                                                                                                                                                                                                                                                                                                                                                                                                                                                                                                                                                                                                                                                                                                                                                                                                                                                                                                                                                             |
|--------|--------------------------------------------------------------------------------------------------------------------------------------------------------------------------------------------------------------------------------------------------------------------------------------------------------------------------------------------------------------------------------------------------------------------------------------------------------------------------------------------------------------------------------------------------------------------------------------------------------------------------------------------------------------------------------------------------------------------------------------------------------------------------------------------------------------------------------------------------------------------------------------------------------------------------------------------------------------------------------------------------------------------------------------------------------------------------------------------------------------------------------------------------------------------------------------------------------------------------------------------------------------------------------------------------------------------------------------------------------------------------------------------------------------------------------------------------------------------------------------------------------------------------------------------------------------------------------------------------------------------------------------------------------------------------------------------------------------------------------------------------------------------------------------------------------------------------------------------------------------------------------------------------------------------------------------------------------------------------------------------------------------------------------------------------------------------------------------------------------------------------------------------------------------------------------------------------------------------------------------------------------------------------------------------------------------------------------------------------------------------------------------------------------------------------------------------------------------------------------------------------------------------------------------------------------------------------------------------------------------------------------------------------------------------------------------------------------------------------------------------------------------------------------------------------------------------------------------------------------------------------------------------------------------------------------------|
| CrPDAT | atgaccacaccgaccaaaggtaatagcaatgcacgtcagcgtaaaaaaggtggcaccagcgcagaag<br>caagcgcagcaaccccgagcaaaaccgggtcgtgatcataatgttcatgcgaccccgagccat<br>agccattcacatagccatagtcagagccagcagcatcgtcaggggtccgatgcagcacagccgaaaag<br>cgaacgtcgtctggttctgtggctggcagcagccgggtgttctgctgccgctgggtgctgctcctccgg<br>cactgatggttgaagaaggtccgggtgcagaactgctgatgatagcctgggtctgctcgtctgaatgca<br>tatctgcctccgctgccgagcattgtgactggatagcctgctggcgagcgcaggtttgcagtccgag<br>cagcgcactgaatggcaccagtccgctgcagcagcagcaaatagcagcgcataataatggtctgctgg<br>cactgtttggtgtaccgggtgatatggcaagtgcaggtatggatgggtctgaccagccgtaccgtaccgca<br>ggcgagcagctgcgtgcatttctggcacagctgcctgcactgagcattccaggtgggtccggcagcagc<br>ggtggtgctcgtggtgctggtgctggtgccgggtcgtggtgcagcgcgtgaagtaatgcaaccgca<br>gccgcagatgaagcagcaggtctgcgtccgggtcagctgatggcacgtcgtggttatcgtgcaaacat<br>ccggtgttattgtccgggtttgtaccagcggctggaactgtggcgtgggtctgccgtggtgacgctg<br>atttcgtcagcgcagtggtggggcacctggcaatggttcaggcatttctgaccgatgcagcatgttggttc<br>gtcacatggaactggataccggttagtggtctggatccggaaggtattaaactgcgtgcagcactgggtta<br>gaagcagttgattattcattcaaggctattgggttgggtaaacgtgtgaagcactggccgatgttggt<br>atgatagcaatagcctggttagcatgccgtatgattggcgtctggcagttccgctgctggaagaacgtgat<br>ggttattataaccgctcgtcgtctgaccattgaacagctggtgaaactgaccggggaacgtgtgttgacca<br>gccatagttatggtgaaaatgtttcgtgccttcattgcattgggtgaaagccgcagctgccgaagaagagg<br>aagcggtaaacagcctcgtagtgggtggtgtagcggcattcaggtgggtggtgggtgtagcgtcatatt<br>gcaagcaccattaacattgcagcaccagcctgggtgtccgaaaagtgttagcgcactgctgagcgggt<br>gaaaccgtgataccgcacagctgggtgccctggcaggttttctgaccagtaatatggtcccgctgccg<br>cacgtaccgctgtttggcgtagctgggtgcaagctatgcaatgctgccggtggtggcctggtgtgtg<br>gggtaatgcaagctgggcacctgatgataccggaaaatgcgtgcaaatcgtcgcaccttggttagcatg<br>gttagcctgtggcctcataattggcagcgcctgatggcagctgcaccgcagcaacagcgcgaacagctg<br>agccagctggttagccgaagttagccaggatgttgatgcaggtagcggtagcggttctggttagtggtcag<br>gatcaggttctggcagcggtagtggtgacgcggctcaggtctggtcaggtagtggtgaagatgcagtta<br>atggtacaggtggtgcaggtagtgccgggtgggctgactggctccggcagaagcagcggcagttggt<br>acagcagcgggtggtgataatgccacagcagccaccgcagttaatagcaccaccgaagcaatagtac<br>cggtagcgcagcaccggtagcagcgggtccgggtgtagcagcagctcaaaagcaattgcagccattg<br>cagataccatcaaaaaactggtaggtgggtggcgtgatgccgcagaatttctgaatagcgtatcatgacc<br>cgtctggtatgtagcggtttattgactgctgcgtgaagtggcgggtccgctggttagcgaatattgcac<br>agtggggtgcgtgcagttacctgcagaagaggcagccgaagcagttcgtaacgtgccgcagcagc<br>gagcgtcgtgcagctcctccgcagccgggttccggcagcacaggctgttggtggtgcccgtatcgtgtt<br>aaagatagcactccgggtggtcgggtgacgcaggtattggtcgtggtggttcacagcaggttcaggtc<br>gtgttccctgtttccggatgcaaccgtacaccgctgccgtcagcaccgaaaaccaccatggtttgtctg<br>tatggtgttgccctgccgaccgaacgcgggtatcattatctcgtcctccgcctccgaccgggtgcagccgc<br>aaccgcaacagccgcagcggcaaatgaccggcaggtaatgcggctgcagccctgcagcagatgca<br>cagcctctccacaagccgctggcggaggtgatggtgatggcatggcaaccaccgatggtacagcggga<br>agccgatgcagaacgtggtgtccgcctcgtggtgcaaccgcctcaggtgaagaggcaaatcctgatgc |

|        |                                                                                                                                                                                                                                                                                                                                                                                                                                                                                                                                                                                                                                                                                                                                                                                                                                                                                                                                                                                                                                                                                                                                                                                                                                                                                                                                                                                                                                                                                                                                                                                                                                                                                                                                                                                                                                                                                                                                                                                                                                             |
|--------|---------------------------------------------------------------------------------------------------------------------------------------------------------------------------------------------------------------------------------------------------------------------------------------------------------------------------------------------------------------------------------------------------------------------------------------------------------------------------------------------------------------------------------------------------------------------------------------------------------------------------------------------------------------------------------------------------------------------------------------------------------------------------------------------------------------------------------------------------------------------------------------------------------------------------------------------------------------------------------------------------------------------------------------------------------------------------------------------------------------------------------------------------------------------------------------------------------------------------------------------------------------------------------------------------------------------------------------------------------------------------------------------------------------------------------------------------------------------------------------------------------------------------------------------------------------------------------------------------------------------------------------------------------------------------------------------------------------------------------------------------------------------------------------------------------------------------------------------------------------------------------------------------------------------------------------------------------------------------------------------------------------------------------------------|
|        | <p>tggcggatgatcaagcagtggtggatgattatgaaagatgtaccaggcacagagcgcactggatggtggtgtcatattagcgcaggtgatggtacgggtcctctgctgagctgggtctgatgtcgcgggtggtggtcgtgaagcaggtcatctaatccgggtgcaatcgctgtgttaccgtgaatataaacataaagcagtgagcatgctgcaggatgcacgtggcggccagcagccgcacatattgatattctgggtaatgatgccgttc tgcgtgatgtgattaccgttggcaggtcgtgcagatgaactggcagatattgtttagc gatattgatcgt attgcggcagccgttgattgggcagcgtggcagcctaa</p>                                                                                                                                                                                                                                                                                                                                                                                                                                                                                                                                                                                                                                                                                                                                                                                                                                                                                                                                                                                                                                                                                                                                                                                                                                                                                                                                                                                                                                                                                                                                                                                                                                       |
| ScPDAT | <p>atgggcaccctgttcgtcgtaatgtcagaatcagaaaagc gatagcgcgaaaataacaaagggtgta gcgtgcataataaacgtgaaagccgtaacatcatccatcagcaaggctgggtcataaacgtcgtcgt ggtattagcggtagcgcgaaaacgtaataacgtggcaagatttgatcgcgaaacgtgatgtaatggtc gtaaacgttggcgtgatagccgtcgtctgattttatcctgggtgcatttctgggtgttctgctgccgttagct ttggtgcatatcatgttcataatcggatagcgcacctgttcgataactttgtaattc gatagcctgaaaggt atctggatgattgaaagatgttctgccgcagggtattagcagcttattgatgatattcaggcaggcaatta tagcaccagcagcctggatgatctgagcgcgaaaatggcagttgtaaacagctgctgcgcgattataaca ttgaagcaaacatccgggtgttatggttccgggtgttattagcaccgggtattgaaagctgggggtgtgattg gtgatgatgaatgtgatagcagcgcacatttcgtaaacgcctgtgggtagctttatatgtcgtaccat ggttatggataaagtttgggtgaaacacgttatgctggatccggaaaccgtctggatccgctaatttt accctgcgtgccgcaggggtttgaaagcaccgattattcattgccgggtattggattggaacaagggtgt tcagaatctgggcgttattggtatgaaccgaataaaaatgaccagcgcagcctatgattggcgtctggcat atctggatctggaacgtcgtgatcgttatttcacaaactgaaagagcagatcgaactgttcatcagctga gcgggtgaaaaagttgtctgattggtcatagcatgggcagccagattatcttctatttatgaaatgggtcga agccgaaggtccgctgtatggcaatggtggctggtgggttaataacatc gatagctttattaacgc agcaggcaccctgctgggtgcaccgaaagcagttccggcactgattagtggtaaatgaaagataccat ccagctgaataccctggcaatgtatggtctggaaaaattcttagccgtatcgaacgtgttaaatgctgca gacctgggggtgttattccgagcatgctgccgaaaggtgaagaagtatttggggagatatgaaaagcag cagcgaagatgcactgaataacaataccgatacctatggcaactcattcgtttgaacgtaataaccagtga cgctttaacaaaaacctgacctgaaagatgcgatcaatagaccctgagcattagctccggaatggctgc agcgtcgtgtgatgaacagatagtttgggtatagcaaaaacgaagaggactgcgcaaaaatgaact gcatcataaacattggagcaaccgatggaagtccgctgccggaagcaccgcatatgaaaatctattgt atttacggcgtgaacaatccgaccgaacgtgcatatgttataaagaaggac gatagctcagcactga atctgaccattgattatgaaagcaaacagccgggttttctgaccgaaggatggcaccgttccgctggtg cacatagcatgtgcataaatgggcacaggggtgcaagcccgtataatccggcaggtattaatgttaccatc gtggaaatgaaacatcagccggatcgtttgatattcgtggtggtgcaaaaagcgcagaacatgttgatatt ctgggtagtcgaaactgaacgattacattctgaaaattgcaagcggtaaatggtgatctggttgaaccgcg tcagctgtcaaatctgagccagtggggttagccagatgccgttccgatg</p> |
| RcPDAT | <p>atgtctatcctgcgtcgtcgtctgctgttcagaactcttctcagatcgaagctgacaacgacgaaaaagaa aaagaaaaacgtaaacgtaaaaaagaaatcaaaaaatggcgttgcttgacaactgctgctggttcacg gtttcactctgctctatgtggtggttctgctgttctgtacaacgctatgccggcttcttccgcagtacgtta ccgaagctatcaccgggtccgatccggaccgccgggtgttaactgcgtaaagaaggctgaccgtta aacatccagttgtcttcgtcccgggtatcgtaccgggtgctggaactgtgggaaggtcaccagtgctgct gacggctgttccgtaaacgtctgtgggggtgtaccttcgggtgacctgtacaacgtccgctgtgctgggtt</p>                                                                                                                                                                                                                                                                                                                                                                                                                                                                                                                                                                                                                                                                                                                                                                                                                                                                                                                                                                                                                                                                                                                                                                                                                                                                                                                                                                                                                                                                                                                                                                                              |



gaacacatgtctctggacaacgaaaccggtctggaccgccgggtatccgttcgttctgttctggctctg  
gttgctgctgactactcgtctgctggttactcgtttgggctgttctgatcgtaacctggctcgtctgggttac  
gaagaaaaaacatgtacatggctgcttacgactggcgtctcagctccagaacaccgagatccgtgacc  
agtctctgtctcgtatcaaatctaacatcgaactgatggtgctaccaacgggtgtaacaaagtgttctg  
ccgcactctatgggtgtccgtacttctgcacttcatgaaatgggtgaagctccggctccgatgggtggt  
gggtggtggtccggactggtgcgctaaacacatcaaagctgtatcaacatcgggtggtccgttctgggtg  
tccgaaagetatcttctctgttctctaacgaaggtcgtgacatcgtcgtcgtcgttctcgtccgggt  
tcttgacaagacgtttcggctcgcagacctccagcacgctatcgtctgacctgacctgggactct  
acctgtctatgatcccgaaggtggtgaaacctctggggtggtctggactggtctccggaaggtgttta  
caactgcggttctaacaccccgaaaaacaacaacaccagaccgtggtcagaccggtaaaggtacctc  
tctttaccgaaggtgtaactacggctcgtatcatcttctcggtaaagacgttctgtaactgcacttctaa  
aatcaccggtatcgactccgtgacgctgtaaaaggtaacggttgtaacaactgcgacatctggaccg  
aataccaggaaatgggtatcggtggtatcaaagctgttgctgactacaaagttacaccgctggtctgttat  
cgacctgctgcactcgttctccgaaactgatggctcgtgggtgacgctcacttctcaggtatcgtga  
caacctggacgaccgaaatacgaactacaaatactggtcctaaccgctggaacccgctcgcgga  
cgctccggaatggaactgfactctatgtacgggtatccgacctgacctgcttacctacaact  
gacctgacctctgaatcgctatcccgtccagatcgacacctctgttaccggtggtctgaaaactcttg  
cctgaaagacggtacctgaacgttaacgggtgacgaaaccgtccggttctcggctggcttcatgttcg  
ctaagggtggcgtggtaaaacccgttcaaccgctctgggtatccacacctacatccgtgaatacaaccac  
gctccgccggctaacctgctggaaggtcgtggtaccagctggtgctcacgttgacatcctgggtaactt  
cgctctgatcgaagacgttctcgtatcgtcgtggtgctcgtggtgaagacctgggtggtgacctgttta  
ctctgacatctcaaatggtctgaaaaaatcaacctgccgctg

**Table S2 Information on PDAT proteins used in this study.**

| Protein name | Organism                              | Number of amino acids | Database accession number |
|--------------|---------------------------------------|-----------------------|---------------------------|
| CoPDAT       | <i>Camellia oleifera</i>              | 673                   | AKI88004.1                |
| CsPDAT       | <i>Camelina sativa</i>                | 671                   | AQU71887.1                |
| AtPDAT       | <i>Arabidopsis thaliana</i>           | 671                   | AED91921.1                |
| RcPDAT       | <i>Ricinus communis</i>               | 685                   | ADK92410.1                |
| EsPDAT       | <i>Eutrema salsugineum</i>            | 671                   | XP_006399859.1            |
| BnPDAT       | <i>Brassica napus</i>                 | 660                   | XP_022568870.1            |
| GhPDAT       | <i>Gossypium hirsutum</i>             | 697                   | XP_016733508.1            |
| CrPDAT       | <i>Chlamydomonas reinhardtii</i>      | 1040                  | AFB73928.1                |
| PpPDAT       | <i>Pseudochlorella pringsheimii</i>   | 649                   | AOS88520.1                |
| LiPDAT       | <i>Lobosphaera incisa</i>             | 691                   | ANH71127.1                |
| PhPDAT       | <i>Plasmopara halstedii</i>           | 670                   | CEG44972.1                |
| FsoPDAT      | <i>Fistulifera solaris</i>            | 702                   | GAX24664.1                |
| OtPDAT       | <i>Ostreococcus tauri</i>             | 665                   | XP_003081310.1            |
| TpPDAT       | <i>Thalassiosira pseudonana</i>       | 468                   | XP_002286433.1            |
| FsPDAT       | <i>Fistulifera solaris</i>            | 703                   | GAX19192.1                |
| DsPDAT       | <i>Diplodia seriata</i>               | 634                   | KKY28315.1                |
| AcPDAT       | <i>Aspergillus campestris</i>         | 621                   | PKY08229.1                |
| CaPDAT       | <i>Coniosporium apollinis</i>         | 641                   | XP_007779229.1            |
| DcPDAT       | <i>Diplodia corticola</i>             | 634                   | XP_020133357.1            |
| AcIPDAT      | <i>Aspergillus clavatus</i>           | 632                   | XP_001270995.1            |
| AcaPDAT      | <i>Aspergillus candidus</i>           | 621                   | PLB40870.1                |
| PcPDAT       | <i>Pochonia chlamydosporia</i>        | 623                   | XP_022285424.1            |
| AbPDAT       | <i>Aspergillus bombycis</i>           | 625                   | XP_022393766.1            |
| NpPDAT       | <i>Neofusicoccum parvum</i>           | 637                   | XP_007582622.1            |
| PsPDAT       | <i>Penicillium subrubescens</i>       | 633                   | OKO99574.1                |
| ApPDAT       | <i>Aureobasidium pullulans</i>        | 636                   | KEQ89966.1                |
| AIPDAT       | <i>Aspergillus lentulus</i>           | 621                   | GAQ04464.1                |
| PgPDAT       | <i>Penicillium griseofulvum</i>       | 622                   | KXG48669.1                |
| BsPDAT       | <i>Byssochlamys spectabilis</i>       | 630                   | GAD93278.1                |
| ArPDAT       | <i>Aspergillus rambellii</i>          | 630                   | KKK27008.1                |
| SpPDAT       | <i>Schizosaccharomyces pombe</i>      | 632                   | NP_596330.2               |
| SoPDAT       | <i>Schizosaccharomyces octosporus</i> | 632                   | XP_013018030.1            |
| ZbPDAT       | <i>Zygosaccharomyces bailii</i>       | 645                   | CDH09035.1                |
| LmPDAT       | <i>Lachancea meyersii</i>             | 642                   | SCV03918.1                |
| ScPDAT       | <i>Saccharomyces cerevisiae</i>       | 661                   | NP_014405.1               |
| OpPDAT       | <i>Ogataea parapolyomorpha</i>        | 659                   | XP_013933810.1            |
| KmPDAT       | <i>Kluyveromyces marxianus</i>        | 640                   | BAP73190.1                |

### **Western blot analysis**

Engineered cells harbouring either *CrPDAT* or  $\Delta TM$ -*CrPDAT* were cultivated at 37°C in LB medium supplemented with kanamycin until their OD<sub>600</sub> reached 0.6. Then cells were cultured at 30°C for 4 hr after addition of 0.5 mM isopropyl  $\beta$ -D-thiogalactoside (IPTG). Cells were collected by centrifugation, resuspended in sodium dodecyl sulfate (SDS) sample buffer and boiled for 5 min. Protein samples were next separated on a 12% polyacrylamide gel and transferred to a nitrocellulose membrane. After blocking non-specific binding using 5% skim milk for 1 hr, the blots were incubated with anti His-tag (His Mouse Mab, Promoter) at 4°C overnight. Membranes were washed three times with TTBS buffer (20mM Tris-HCl, 150mM NaCl, 0.1% Tween 20, pH 7.6) and incubated with an appropriate secondary antibody (HRP-Goat Anti Mouse IgG(H+L), Merck) for 1 hr at room temperature. After being washed three times with TTBS, direct chemiluminescence (SuperSignal™, Thermo Scientific) imaging of the blots was performed using the ChemiDox XRS (BioRad) imaging system. Engineered cells harbouring empty vector pRSFDuet-1 were used as control.

### ***In vitro* assay for detecting TAG lipase activity**

For the collection of recombinant PDAT protein,  $\Delta\Delta$ BL21 harboring pRSF::*CrPDAT* or pRSF::*CrPDAT*-Phe-262-Gly was incubated into LB medium containing 50 mg/L kanamycin and incubated at 37°C with shaking at 200 rpm overnight.  $\Delta\Delta$ BL21 harboring the empty vector pRSFDuet-1 was used as a negative control for this assay. The seed cultures were subsequently incubated into 50 mL LB containing 50 mg/L kanamycin in 250 mL flask at 37°C with shaking at 200 rpm until the OD<sub>600</sub> reached 0.7. IPTG (Isopropyl- $\beta$ -D-thiogalactopyranoside) was added into the culture at a final concentration of 0.1 mM, and the cells was induced at 15°C for another 20 hrs with shaking at 200 rpm. Cells were harvested by centrifugation at 6000 rpm for 8 min, and then washed with 50 mM Tris-HCl buffer (pH 7.4) twice. After transferred into 2 mL tubes, cells were lysed by ultrasonic disruption at 20 Hz for 10 min (time for each treatment was 3 min, with a 2 min interval). The supernatants were collected by centrifugation at 4°C.

To investigate the TAG lipase activity of CrPDAT and its mutant Phe-262-Gly, 20  $\mu$ L of crude enzymes in 50 mM potassium phosphate buffer (pH 7.4) were added into a 400  $\mu$ L of reaction mixture containing 339  $\mu$ L PBS buffer, 1  $\mu$ L tween20, and 40  $\mu$ L C15:0-TAG. The mixture was incubated at 30°C for 10 min. The reaction was terminated by 375  $\mu$ L methanol and chloroform with ratio of 2:1 (v/v). Lipids were extracted from the mixture by adding 375  $\mu$ L mixture of methanol and chloroform (1:1, v/v) into the reaction. The extracted lipids were next analyzed by TLC as mentioned in Materials and Methods.
